# Supplementary material
Source: PubMed Central journal article supplement (PMC3059436)
Supplement: mmc1.pdf [file mmc1.pdf]

**The American Journal of Human Genetics, Volume 88**

**Supplemental Data**

**Genome-wide Association Study Identifies Genetic Variation  
in *Neurocan* as a Susceptibility Factor for Bipolar Disorder**

Sven Cichon,<sup>1,2,3,4,\*</sup> Thomas W. Mühleisen,<sup>2,3,4</sup> et al.

<sup>1</sup>Institute of Neuroscience and Medicine (INM-1), Structural and Functional Organization of the Brain, Genomic Imaging, Research Center Juelich, D-52425 Juelich, Germany;

<sup>2</sup>Department of Genomics, Life & Brain Center, University of Bonn, <sup>3</sup>Institute of Human Genetics, University of Bonn, D-53127 Bonn, Germany.

<sup>4</sup>These authors contributed equally to this work.

\*Correspondence: [sven.cichon@uni-bonn.de](mailto:sven.cichon@uni-bonn.de)

**Members of the Bipolar Disorder Genome Study (BiGS) Consortium**

John R. Kelsoe<sup>1,2</sup>, Tiffany A. Greenwood<sup>1</sup>, Caroline M. Nievergelt<sup>1</sup>, Thomas B. Barrett<sup>1</sup>, Rebecca McKinney<sup>1</sup>, Paul D. Shilling<sup>1</sup>, Nicholas J. Schork<sup>3,5</sup>, Erin N. Smith<sup>3,4</sup>, Cinnamon S. Bloss<sup>3,5</sup>, John Nurnberger<sup>6</sup>, Howard J. Edenberg<sup>7,8</sup>, Tatiana Foroud<sup>8</sup>, Daniel L. Koller<sup>6</sup>, Elliot S. Gershon<sup>9</sup>, Chun-Yu Liu<sup>9</sup>, Judith A. Badner<sup>9</sup>, William Scheftner<sup>10</sup>, William B. Lawson<sup>11</sup>, Evaristus A. Nwulia<sup>11</sup>, Maria Hipolito<sup>11</sup>, William Coryell<sup>12</sup>, John Rice<sup>13</sup>, William Byerley<sup>14</sup>, Francis McMahon<sup>15</sup>, Thomas G. Schulze<sup>15</sup>, Wade Berrettini<sup>16</sup>, James B. Potash<sup>17</sup>, Peter P. Zandi<sup>17</sup>, Pamela B. Mahon<sup>17</sup>, Melvin McInnis<sup>18</sup>, David Craig<sup>19</sup>, Szabolcs Szelinger<sup>19</sup>

<sup>1</sup>Department of Psychiatry, University of California, San Diego, and <sup>2</sup>Department of Psychiatry, VA San Diego Healthcare System, La Jolla, CA, USA. <sup>3</sup>Scripps Genomic Medicine, Scripps Translational Science Institute, and <sup>4</sup>Department of Molecular and Experimental Medicine, The Scripps Research Institute, and <sup>5</sup>Scripps Health, La Jolla, CA, USA. <sup>6</sup>Department of Psychiatry, Indiana University School of Medicine, and <sup>7</sup>Department of Biochemistry and Molecular Biology, Indiana University School of Medicine, and <sup>8</sup>Department of Medical and Molecular Genetics, Indiana University School of Medicine, Indianapolis, IN, USA. <sup>9</sup>Department of Psychiatry, University of Chicago, and <sup>10</sup>Department of Psychiatry, Rush University, Chicago, IL, USA. <sup>11</sup>Department of Psychiatry, Howard University, Washington, DC, USA. <sup>12</sup>Department of Psychiatry, University of Iowa, Iowa City, IA, USA. <sup>13</sup>Division of Biostatistics, Washington University, St Louis, MO, USA. <sup>14</sup>Department of Psychiatry, University of California, San Francisco, San Francisco, CA, USA. <sup>15</sup>Genetic Basis of Mood and Anxiety Disorders Unit, National Institute of Mental Health Intramural Research Program, National Institutes of Health, US Department of Health and Human Services, Bethesda, MD, USA. <sup>16</sup>Department of Psychiatry, University of Pennsylvania, Philadelphia, PA, USA. <sup>17</sup>Department of Psychiatry, Johns Hopkins School of Medicine, Baltimore, MD, USA. <sup>18</sup>Department of Psychiatry, University of Michigan, Ann Arbor, MI, USA. <sup>19</sup>Neurogenomics Division, The Translational Genomics Research Institute, Phoenix, AZ, USA.

**Table S1. Evidence for Association at the *ANK3* Locus in Previous Studies of BD and in Cichon, Mühleisen *et al.***

| Previous GWAS |                                 |                                                 |                        |             | GWAS of this study      |             |
|---------------|---------------------------------|-------------------------------------------------|------------------------|-------------|-------------------------|-------------|
| SNP           | Sample                          | Study                                           | P value                | OR (allele) | TREND P                 | OR (allele) |
| rs10994336    | WTCCC + STEP-UCL + ED-DUB-STEP2 | Ferreira <i>et al.</i> (2008) <sup>4</sup>      | 9.1 x 10 <sup>-9</sup> | 1.45 (T)    | 0.131 (imp)             | 1.22 (T)    |
| rs10994336    | German                          | Schulze <i>et al.</i> (2009) <sup>8</sup>       | 0.0001                 | 1.70 (T)    |                         |             |
|               | NIMH waves 1-4                  |                                                 | > 0.05                 |             |                         |             |
|               | NIMH wave 5                     |                                                 | > 0.05                 |             |                         |             |
|               | three-sample meta-analysis      |                                                 | 1.7 x 10 <sup>-5</sup> | 1.54 (T)    |                         |             |
| rs10994336    | GSK                             | Scott, Muglia <i>et al.</i> (2009) <sup>5</sup> | 0.042                  | 1.37 (n.a.) |                         |             |
|               | GSK + NIMH waves 1-5            |                                                 | 0.012                  | 1.40 (n.a.) |                         |             |
| rs1938526     | WTCCC + STEP-UCL + ED-DUB-STEP2 | Ferreira <i>et al.</i> (2008) <sup>4</sup>      | 1.3 x 10 <sup>-8</sup> | 1.40 (G)    | 0.0766                  | 1.25 (G)    |
| rs9804190     | German                          | Schulze <i>et al.</i> (2009) <sup>8</sup>       | 0.0006                 | 1.34 (C)    | 5.93 x 10 <sup>-4</sup> | 1.32 (C)    |
|               | NIMH waves 1-4                  |                                                 | 0.050                  | 1.24 (C)    |                         |             |
|               | NIMH wave 5                     |                                                 | 0.017                  | 1.38 (C)    |                         |             |
|               | three-sample meta-analysis      |                                                 | 3 x 10 <sup>-6</sup>   | 1.32 (C)    |                         |             |

NIMH, National Institute of Mental Health; OR, odds ratio; n.a., not available; TREND, Cochran-Armitage trend test; imp, Imputation was performed using MACH (version 1.0.16) (Y. Li and G.R. Abecasis, 2006, *Am. Soc. Hum. Genet. abstract*) with phased haplotypes from the 60 CEU founders (HapMap phase II, release 22) as a reference. MACH quality score was > 95%.

**Table S2. Genome-wide Datasets of BD for Extraction of *NCAN* rs1064395 Genotypes (Replication II)**

| Sample                       | Patients | Controls | Genotyping Platform      | rs1064395 Imputed? | Study                                                                                                                                                                |
|------------------------------|----------|----------|--------------------------|--------------------|----------------------------------------------------------------------------------------------------------------------------------------------------------------------|
| GAIN-EA / TGEN1 <sup>a</sup> | 2,189    | 1,434    | A6                       | No                 | Smith, Bloss <i>et al.</i> (2009); <sup>6</sup> BiGS                                                                                                                 |
| WTCCC-BD / Exp. Ref. Grp.    | 1,868    | 14,311   | A500                     | No                 | WTCCC (2007) <sup>1</sup>                                                                                                                                            |
| Germany III <sup>b</sup>     | 501      | 866      | I550, I610Q, I660Q, IO1Q | No                 | Muglia <i>et al.</i> (2010); <sup>43</sup> Cichon, Mühleisen <i>et al.</i>                                                                                           |
| France <sup>c</sup>          | 484      | 1,823    | I300, I550, I610Q        | Yes                | Etain <i>et al.</i> (2010); <sup>44</sup> Cichon, Mühleisen <i>et al.</i>                                                                                            |
| Iceland <sup>d</sup>         | 422      | 11,487   | I300                     | Yes                | Thorgerirsson <i>et al.</i> (2003); <sup>45</sup> deCODE                                                                                                             |
| Australia <sup>e</sup>       | 390      | 1,530    | I610Q                    | No                 | McAuley <i>et al.</i> (2009); <sup>46</sup> Mitchell <i>et al.</i> (2009); <sup>47</sup> Medland <i>et al.</i> (2009); <sup>48</sup> Cichon, Mühleisen <i>et al.</i> |
| Norway (TOP)                 | 203      | 372      | A6                       | No                 | Djurovic <i>et al.</i> (2010); <sup>49</sup> Athanasiu <i>et al.</i> (2010) <sup>50</sup>                                                                            |

<sup>a</sup> GAIN-EA data have been described in a previous study.<sup>6</sup> TGEN1 samples were genotyped and quality-controlled at the Translational Genomics Research Institute (Phoenix, USA): There were 1,190 patients and 401 controls for association analysis and SNP rs1064395 passed filters for CR (> 95%), MAF > 1%, HWE ( $p < 1 \times 10^{-6}$ ). GAIN-EA/TGEN1 datasets are part of the BiGS consortium.

<sup>b</sup> Patients were recruited from consecutive admissions to psychiatric hospitals (in Wiesloch, Würzburg, Dresden, and Tübingen, Germany). They were genotyped at the Life & Brain Center (Bonn, Germany). Control genotypes were extracted from a published study<sup>43</sup>. Using the QC protocol described for replication I, 4 patients and 9 controls were excluded.

<sup>c</sup> Patients have been reported previously.<sup>44</sup> Controls were genotyped at the Centre National de Génotypage (Evry, France). 13 patients and 65 controls were excluded (QC protocol of replication I). Imputation was performed using MACH (version 1.0.16) (Y. Li and G.R. Abecasis, 2006, *Am. Soc. Hum. Genet.* abstract) with phased haplotypes from the 60 HapMap-CEU founders (release 22) as a reference. MACH quality score was > 95%.

<sup>d</sup> About 27% of the patients have been reported previously.<sup>45</sup> Controls were recruited by various genetic programs at deCODE genetics (Reykjavik, Iceland). For imputation, an algorithm was written that is based on the IMPUTE model<sup>51</sup> and phased haplotype data, generated in the Icelandic population.<sup>52</sup> The IMPUTE info score was 98.9%.

<sup>e</sup> Patients were described in previous studies.<sup>46,47</sup> They were genotyped at the Life & Brain Center (Bonn, Germany). Controls are parents of adolescent twins who participated in a longitudinal study of a variety of phenotypes including melanoma risk factors, cognition and personality, but have not been selected for any particular phenotype. They were genotyped in a previous study.<sup>48</sup> 10 patients and no control were excluded (QC protocol of replication I).

The following abbreviations are used: A500, Affymetrix GeneChip 500K Mapping Array Set (Nspl + Styl); A6, Affymetrix Genome-wide Human SNP Array 6.0; BiGS, Bipolar Disorder Genome Study Consortium; CNG, Centre National de Génotypage (Evry, France); deCODE, deCODE genetics (Reykjavik, Iceland); Exp. Ref. Grp., Expanded Reference Group for WTCCC-BD;<sup>1</sup> GAIN-EA, BD sample with European ancestry from the Genetic Association Information Network;<sup>6</sup> I300, Illumina HumanHap300; I550, Illumina HumanHap550; I610Q, Illumina Human610-Quad; I660Q, Illumina Human660W-Quad; IO1Q, Illumina HumanOmni1-Quad; TGEN1, Translational Genomics Research Institute genotyping wave 1 (Phoenix, USA); TOP, Thematically Organized Psychosis Study (Oslo, Norway).

**Table S3. Association Results from the GWAS of BD, the Replication Step I Using Six Independent European Samples, and the Combined Analysis**

| SNP data             |          | Association data |                         |      |                |                  |               |                               |       |                  |                                          |    |                         |      |                  |                  |
|----------------------|----------|------------------|-------------------------|------|----------------|------------------|---------------|-------------------------------|-------|------------------|------------------------------------------|----|-------------------------|------|------------------|------------------|
| Marker, minor allele | Band     | GWAS             |                         |      |                |                  | Replication I |                               |       |                  | Combined analysis (GWAS + Replication I) |    |                         |      |                  |                  |
|                      |          | TREND            | MAF                     |      | CMH (K = 6)    |                  |               | MAF                           |       | CMH (K = 6)      |                                          |    | MAF                     |      |                  |                  |
|                      |          | RK               | P                       | OR   | Patients (682) | Controls (1,300) | RK            | P                             | OR    | Patients (1,729) | Controls (2,313)                         | RK | P                       | OR   | Patients (2,411) | Controls (3,613) |
| rs1064395, A         | 19p13.11 | 4                | 3.42 x 10 <sup>-6</sup> | 1.53 | 0.19           | 0.14             | 1             | <b>4.61 x 10<sup>-4</sup></b> | 1.23  | 0.20             | 0.16                                     | 1  | 3.02 x 10 <sup>-8</sup> | 1.31 | 0.195            | 0.153            |
| rs11764590, T        | 7p22.3   | 2                | 1.30 x 10 <sup>-6</sup> | 1.47 | 0.27           | 0.20             | 2             | <b>0.0020</b>                 | 1.18  | 0.26             | 0.22                                     | 2  | 1.28 x 10 <sup>-7</sup> | 1.26 | 0.260            | 0.216            |
| rs10278591, T        | 7p22.3   | 8                | 6.05 x 10 <sup>-6</sup> | 1.43 | 0.27           | 0.21             | 5             | <b>0.0348</b>                 | 1.12  | 0.26             | 0.23                                     | 3  | 1.81 x 10 <sup>-5</sup> | 1.21 | 0.260            | 0.224            |
| rs6547829, T         | 2p23.2   | 73               | 7.21 x 10 <sup>-5</sup> | 1.59 | 0.11           | 0.07             | 3             | <b>0.0134</b>                 | 1.22  | 0.09             | 0.08                                     | 4  | 2.50 x 10 <sup>-5</sup> | 1.32 | 0.096            | 0.076            |
| rs985409, G          | 7q22.1   | 62               | 6.52 x 10 <sup>-5</sup> | 1.31 | 0.45           | 0.38             | 4             | <b>0.0206</b>                 | 1.11  | 0.47             | 0.44                                     | 5  | 3.89 x 10 <sup>-5</sup> | 1.17 | 0.463            | 0.422            |
| rs2209263, A         | 9q21.31  | 33               | 3.44 x 10 <sup>-5</sup> | 0.73 | 0.24           | 0.30             | 8             | <b>0.0436</b>                 | 0.90  | 0.26             | 0.28                                     | 6  | 5.58 x 10 <sup>-5</sup> | 0.84 | 0.256            | 0.290            |
| rs779279, A          | 3q28     | 42               | 4.25 x 10 <sup>-5</sup> | 0.76 | 0.41           | 0.48             | 7             | <b>0.0402</b>                 | 0.91  | 0.46             | 0.48                                     | 7  | 6.39 x 10 <sup>-5</sup> | 0.86 | 0.447            | 0.481            |
| rs9322993, T         | 14q21.1  | 74               | 7.56 x 10 <sup>-5</sup> | 1.75 | 0.07           | 0.04             | 6             | <b>0.0382</b>                 | 1.23  | 0.06             | 0.05                                     | 8  | 7.54 x 10 <sup>-5</sup> | 1.37 | 0.065            | 0.048            |
| rs422159, A          | 17p13.3  | 36               | 3.76 x 10 <sup>-5</sup> | 1.33 | 0.43           | 0.36             | 10            | 0.0560                        | 1.09  | 0.39             | 0.37                                     | 9  | 8.92 x 10 <sup>-5</sup> | 1.16 | 0.401            | 0.367            |
| rs11577112, G        | 1p36.13  | 15               | 9.85 x 10 <sup>-6</sup> | 1.50 | 0.18           | 0.13             | 12            | 0.1138                        | 1.10  | 0.16             | 0.15                                     | 10 | 1.57 x 10 <sup>-4</sup> | 1.21 | 0.169            | 0.142            |
| rs3996329, T         | 7p22.3   | 17               | 1.32 x 10 <sup>-5</sup> | 1.45 | 0.23           | 0.17             | 11            | 0.1124                        | 1.09  | 0.21             | 0.20                                     | 11 | 1.72 x 10 <sup>-4</sup> | 1.19 | 0.217            | 0.187            |
| rs6488297, A         | 12p13.2  | 6                | 3.71 x 10 <sup>-6</sup> | 1.51 | 0.20           | 0.14             | 19            | 0.2994                        | 1.07  | 0.17             | 0.16                                     | 12 | 5.52 x 10 <sup>-4</sup> | 1.19 | 0.178            | 0.154            |
| rs2654205, C         | 15q25.2  | 66               | 6.66 x 10 <sup>-5</sup> | 1.35 | 0.30           | 0.25             | 15            | 0.1612                        | 1.08  | 0.26             | 0.25                                     | 13 | 6.25 x 10 <sup>-4</sup> | 1.16 | 0.272            | 0.248            |
| rs508208, G          | 1q42.3   | 11               | 7.35 x 10 <sup>-6</sup> | 0.73 | 0.33           | 0.41             | 21            | 0.3894                        | 0.96  | 0.37             | 0.38                                     | 14 | 9.39 x 10 <sup>-4</sup> | 0.88 | 0.359            | 0.389            |
| rs2774339, T         | 1q42.3   | 1                | 1.02 x 10 <sup>-6</sup> | 0.71 | 0.33           | 0.42             | 28            | 0.5772                        | 0.97  | 0.37             | 0.38                                     | 15 | 1.08 x 10 <sup>-3</sup> | 0.88 | 0.359            | 0.390            |
| rs4844367, A         | Xq13.1   | 4                | 1.89 x 10 <sup>-4</sup> | 0.75 | 0.41           | 0.49             | 13            | 0.1454                        | 0.93  | 0.44             | 0.46                                     | 16 | 1.11 x 10 <sup>-3</sup> | 0.87 | 0.433            | 0.468            |
| rs6821225, C         | 4q31.22  | 40               | 4.07 x 10 <sup>-5</sup> | 1.31 | 0.43           | 0.36             | 16            | 0.2750                        | 1.05  | 0.38             | 0.37                                     | 17 | 1.71 x 10 <sup>-3</sup> | 1.13 | 0.393            | 0.369            |
| rs281413, A          | 19p13.2  | 46               | 4.82 x 10 <sup>-5</sup> | 0.72 | 0.19           | 0.25             | 17            | 0.2806                        | 0.94  | 0.23             | 0.24                                     | 18 | 1.86 x 10 <sup>-3</sup> | 0.87 | 0.221            | 0.241            |
| rs7297212, A         | 12p13.31 | 27               | 2.40 x 10 <sup>-5</sup> | 1.56 | 0.13           | 0.09             | 20            | 0.3676                        | 1.07  | 0.13             | 0.12                                     | 19 | 2.23 x 10 <sup>-3</sup> | 1.19 | 0.128            | 0.107            |
| rs930906, A          | Xp22.13  | 3                | 1.26 x 10 <sup>-4</sup> | 2.70 | 0.03           | 0.01             | 14            | 0.1596                        | 1.23  | 0.03             | 0.03                                     | 20 | 2.28 x 10 <sup>-3</sup> | 1.47 | 0.033            | 0.021            |
| rs7023951, T         | 9q32     | 38               | 3.86 x 10 <sup>-5</sup> | 1.37 | 0.28           | 0.22             | 23            | 0.4202                        | 1.05  | 0.23             | 0.22                                     | 21 | 2.66 x 10 <sup>-3</sup> | 1.14 | 0.240            | 0.221            |
| rs4743473, A         | 9q31.1   | 25               | 2.37 x 10 <sup>-5</sup> | 1.32 | 0.49           | 0.42             | 27            | 0.5348                        | 1.03  | 0.42             | 0.42                                     | 22 | 3.93 x 10 <sup>-3</sup> | 1.12 | 0.443            | 0.419            |
| rs10500683, C        | 11p15.4  | 35               | 3.75 x 10 <sup>-5</sup> | 0.76 | 0.45           | 0.52             | 25            | 0.5162                        | 0.97  | 0.47             | 0.48                                     | 23 | 4.19 x 10 <sup>-3</sup> | 0.90 | 0.468            | 0.496            |
| rs6506625, A         | 18p11.22 | 44               | 4.40 x 10 <sup>-5</sup> | 0.75 | 0.36           | 0.42             | 26            | 0.5240                        | 0.97  | 0.41             | 0.41                                     | 24 | 4.94 x 10 <sup>-3</sup> | 0.90 | 0.392            | 0.415            |
| rs1435442, C         | 4q35.1   | 7                | 5.90 x 10 <sup>-6</sup> | 1.42 | 0.29           | 0.22             | 30            | 0.7192                        | 1.02  | 0.26             | 0.26                                     | 25 | 5.11 x 10 <sup>-3</sup> | 1.13 | 0.271            | 0.247            |
| rs502224, T          | 11q13.1  | 32               | 3.10 x 10 <sup>-5</sup> | 1.43 | 0.21           | 0.16             | 33            | 0.7962                        | 1.02  | 0.17             | 0.17                                     | 26 | 9.15 x 10 <sup>-3</sup> | 1.14 | 0.185            | 0.166            |
| rs16954276, T        | 15q23    | 3                | 2.83 x 10 <sup>-6</sup> | 0.58 | 0.08           | 0.13             | 41            | 0.8144                        | 1.02  | 0.11             | 0.11                                     | 27 | 0.0119                  | 0.86 | 0.099            | 0.115            |
| rs1889339, C         | 9q22.31  | 12               | 7.60 x 10 <sup>-6</sup> | 1.43 | 0.25           | 0.19             | 46            | 0.9660                        | 0.998 | 0.20             | 0.20                                     | 28 | 0.0200                  | 1.12 | 0.213            | 0.195            |

| Table S3 (continued)    |          |                  |                         |      |                   |                     |               |               |      |                     |                     |                                          |        |      |                     |                     |
|-------------------------|----------|------------------|-------------------------|------|-------------------|---------------------|---------------|---------------|------|---------------------|---------------------|------------------------------------------|--------|------|---------------------|---------------------|
| SNP data                |          | Association data |                         |      |                   |                     |               |               |      |                     |                     |                                          |        |      |                     |                     |
| Marker,<br>minor allele | Band     | GWAS             |                         |      |                   |                     | Replication I |               |      |                     |                     | Combined analysis (GWAS + Replication I) |        |      |                     |                     |
|                         |          | TREND            |                         | MAF  |                   |                     | CMH (K = 6)   |               |      | MAF                 |                     | CMH (K = 6)                              |        |      | MAF                 |                     |
|                         |          | RK               | P                       | OR   | Patients<br>(682) | Controls<br>(1,300) | RK            | P             | OR   | Patients<br>(1,729) | Controls<br>(2,313) | RK                                       | P      | OR   | Patients<br>(2,411) | Controls<br>(3,613) |
| rs9944047, C            | 14q32.2  | 57               | 6.33 x 10 <sup>-5</sup> | 0.76 | 0.44              | 0.51                | 32            | 0.7440        | 0.99 | 0.45                | 0.45                | 29                                       | 0.0121 | 0.91 | 0.446               | 0.474               |
| rs6943047, T            | 7p11.2   | 16               | 1.14 x 10 <sup>-5</sup> | 1.50 | 0.18              | 0.12                | 48            | 1.0000        | 1.00 | 0.14                | 0.14                | 30                                       | 0.0128 | 1.14 | 0.148               | 0.133               |
| rs2398820, G            | 9q22.31  | 20               | 1.70 x 10 <sup>-5</sup> | 1.34 | 0.42              | 0.35                | 47            | 0.9826        | 0.99 | 0.38                | 0.37                | 31                                       | 0.0155 | 1.10 | 0.389               | 0.365               |
| rs11242396, G           | 5q31.2   | 14               | 9.54 x 10 <sup>-6</sup> | 1.38 | 0.33              | 0.27                | 45            | 0.8961        | 0.99 | 0.27                | 0.27                | 32                                       | 0.0164 | 1.11 | 0.286               | 0.271               |
| rs1317266, G            | 4q32.1   | 50               | 5.48 x 10 <sup>-5</sup> | 1.38 | 0.25              | 0.19                | 34            | 0.9184        | 1.01 | 0.21                | 0.21                | 33                                       | 0.0175 | 1.12 | 0.221               | 0.203               |
| rs1931364, A            | 9q22.31  | 26               | 2.40 x 10 <sup>-5</sup> | 1.45 | 0.20              | 0.15                | 43            | 0.8423        | 0.99 | 0.16                | 0.16                | 34                                       | 0.0249 | 1.12 | 0.167               | 0.154               |
| rs7229918, G            | 18q22.3  | 47               | 5.08 x 10 <sup>-5</sup> | 1.35 | 0.32              | 0.26                | 44            | 0.8914        | 0.99 | 0.29                | 0.29                | 35                                       | 0.0298 | 1.10 | 0.300               | 0.281               |
| rs10426528, T           | 19q13.31 | 67               | 6.69 x 10 <sup>-5</sup> | 1.31 | 0.45              | 0.38                | 42            | 0.8296        | 0.99 | 0.39                | 0.39                | 36                                       | 0.0358 | 1.08 | 0.405               | 0.390               |
| rs10231989, C           | 7q21.3   | 28               | 2.78 x 10 <sup>-5</sup> | 1.33 | 0.42              | 0.35                | 38            | 0.7172        | 0.98 | 0.37                | 0.37                | 37                                       | 0.0390 | 1.08 | 0.381               | 0.361               |
| rs6715508, T            | 2q33.2   | 13               | 9.37 x 10 <sup>-6</sup> | 1.45 | 0.23              | 0.17                | 36            | 0.5774        | 0.97 | 0.19                | 0.20                | 38                                       | 0.0422 | 1.10 | 0.201               | 0.188               |
| rs1725262, C            | 1p36.23  | 34               | 3.69 x 10 <sup>-5</sup> | 1.35 | 0.31              | 0.25                | 39            | 0.7453        | 0.98 | 0.27                | 0.27                | 39                                       | 0.0444 | 1.09 | 0.284               | 0.266               |
| rs4461243, A            | 2p22.2   | 63               | 6.62 x 10 <sup>-5</sup> | 1.31 | 0.41              | 0.35                | 40            | 0.7949        | 0.99 | 0.38                | 0.39                | 40                                       | 0.0451 | 1.08 | 0.390               | 0.372               |
| rs17530034, A           | 2q14.3   | 10               | 6.75 x 10 <sup>-6</sup> | 0.52 | 0.05              | 0.08                | 31            | 0.3629        | 1.09 | 0.07                | 0.07                | 41                                       | 0.0689 | 0.87 | 0.063               | 0.073               |
| rs7268, T               | 5q31.3   | 72               | 7.04 x 10 <sup>-5</sup> | 1.30 | 0.52              | 0.45                | 37            | 0.5970        | 0.98 | 0.49                | 0.49                | 42                                       | 0.0721 | 1.07 | 0.498               | 0.477               |
| rs12123953, T           | 1p31.1   | 60               | 6.38 x 10 <sup>-5</sup> | 1.46 | 0.17              | 0.12                | 35            | 0.5465        | 0.96 | 0.15                | 0.15                | 43                                       | 0.0866 | 1.09 | 0.153               | 0.142               |
| rs843319, G             | 6p22.3   | 45               | 4.45 x 10 <sup>-5</sup> | 1.35 | 0.33              | 0.27                | 29            | 0.3004        | 0.95 | 0.31                | 0.32                | 44                                       | 0.166  | 1.06 | 0.318               | 0.304               |
| rs6767011, A            | 3p22.3   | 18               | 1.42 x 10 <sup>-5</sup> | 1.54 | 0.15              | 0.10                | 22            | 0.2001        | 0.91 | 0.11                | 0.12                | 45                                       | 0.185  | 1.08 | 0.121               | 0.114               |
| rs4849303, T            | 2q13     | 52               | 5.63 x 10 <sup>-5</sup> | 0.76 | 0.43              | 0.50                | 24            | 0.2354        | 1.06 | 0.49                | 0.48                | 46                                       | 0.200  | 0.95 | 0.475               | 0.486               |
| rs1203860, A            | 4p16.3   | 31               | 3.08 x 10 <sup>-5</sup> | 1.40 | 0.26              | 0.20                | 18            | 0.1493        | 0.92 | 0.22                | 0.23                | 47                                       | 0.238  | 1.05 | 0.232               | 0.223               |
| rs705648, C             | 2q35     | 69               | 6.76 x 10 <sup>-5</sup> | 1.35 | 0.30              | 0.24                | 9             | <b>0.0277</b> | 0.90 | 0.29                | 0.31                | 48                                       | 0.732  | 1.01 | 0.291               | 0.282               |

Minor allele, refers to dbSNP build 130 and was determined for patients and controls in each analysis; RK (GWAS), rank refers to the rank space between 1 and 75 of all autosomal SNPs and the rank space between 1 and 4 of all X chromosomal markers; P (GWAS), autosomal markers were analyzed using the Cochran-Armitage test (TREND) and X-chromosomal markers were analyzed using the Wald test; MAF, minor allele (MA) frequency; OR, odds ratio referring to minor allele; P (replication), autosomal and X chromosomal markers were analyzed using the Cochran-Mantel-Haenszel (CMH) test (highlighted in bold if p < 0.05); P (combined analysis), autosomal markers were analyzed using the CMH; K, CMH's cluster variable.

**Table S4. Individual Association Results for the Nine GWAS SNPs with Evidence for Association in the Replication Step I (to Investigate the Contribution of each Sample to Each Association, CMH was Performed Across each Combination of 5 out of 6 European Samples)**

| SNP data   | Replication I |              |               |       |          |           |           |               |              |               |       |          |                             |           |               |              |               |       |          |           |           |
|------------|---------------|--------------|---------------|-------|----------|-----------|-----------|---------------|--------------|---------------|-------|----------|-----------------------------|-----------|---------------|--------------|---------------|-------|----------|-----------|-----------|
|            | Germany II    |              |               |       |          |           | Poland    |               |              |               |       |          | Spain                       |           |               |              |               |       |          |           |           |
|            | TREND         |              | CMH (K = 5)   |       | MAF      |           | TREND     |               | CMH (K = 5)  |               | MAF   |          | TREND                       |           | CMH (K = 5)   |              | MAF           |       |          |           |           |
| Marker     | P             | OR           | P             | OR    | M        | Pat (361) | Con (755) | P             | OR           | P             | OR    | M        | Pat (411)                   | Con (504) | P             | OR           | P             | OR    | M        | Pat (297) | Con (391) |
| rs1064395  | <b>0.0490</b> | 1.275        | <b>0.0034</b> | 1.218 | A        | 0.17      | 0.14      | 0.1354        | 1.207        | <b>0.0014</b> | 1.236 | A        | 0.17                        | 0.15      | <b>0.0317</b> | 1.320        | <b>0.0048</b> | 1.207 | A        | 0.26      | 0.21      |
| rs11764590 | 0.8182        | 1.025        | <b>0.0006</b> | 1.236 | T        | 0.24      | 0.23      | 0.0692        | 1.222        | <b>0.0110</b> | 1.167 | T        | 0.25                        | 0.21      | 0.2710        | 1.156        | <b>0.0038</b> | 1.184 | T        | 0.23      | 0.21      |
| rs10278591 | 0.6418        | <b>0.952</b> | <b>0.0070</b> | 1.180 | T        | 0.23      | 0.24      | 0.0840        | 1.209        | 0.1478        | 1.092 | T        | 0.27                        | 0.23      | 0.1400        | 1.213        | 0.0992        | 1.101 | T        | 0.25      | 0.21      |
| rs6547829  | 0.1780        | 1.219        | <b>0.0378</b> | 1.223 | T        | 0.11      | 0.09      | 0.1754        | 1.267        | <b>0.0366</b> | 1.210 | T        | 0.09                        | 0.07      | 0.5406        | 1.119        | <b>0.0140</b> | 1.250 | T        | 0.11      | 0.10      |
| rs985409   | 0.2272        | 1.126        | 0.0546        | 1.107 | G        | 0.47      | 0.44      | 0.1846        | 1.148        | 0.0642        | 1.102 | G        | 0.45                        | 0.42      | 0.4351        | <b>0.912</b> | 0.0612        | 1.116 | <b>A</b> | 0.48      | 0.49      |
| rs2209263  | 0.2378        | 0.885        | 0.1014        | 0.907 | A        | 0.26      | 0.28      | <b>0.0122</b> | 0.772        | 0.3712        | 0.948 | A        | 0.28                        | 0.33      | 0.5970        | <b>1.074</b> | <b>0.0146</b> | 0.872 | A        | 0.24      | 0.23      |
| rs779279   | 0.4708        | 0.936        | 0.0508        | 0.901 | A        | 0.46      | 0.47      | 0.2433        | <b>1.120</b> | 0.1840        | 0.915 | <b>C</b> | 0.47                        | 0.45      | 0.6016        | 0.943        | <b>0.0440</b> | 0.903 | A        | 0.38      | 0.39      |
| rs9322993  | 0.3232        | 1.212        | 0.0674        | 1.232 | T        | 0.06      | 0.05      | 0.4360        | 1.183        | 0.0538        | 1.239 | T        | 0.06                        | 0.05      | 0.2322        | 1.272        | 0.0836        | 1.214 | T        | 0.08      | 0.07      |
|            | Russia        |              |               |       |          |           | Romania   |               |              |               |       |          | Bosnia-Herzegovina / Serbia |           |               |              |               |       |          |           |           |
|            | TREND         |              | CMH (K = 5)   |       | MAF      |           | TREND     |               | CMH (K = 5)  |               | MAF   |          | TREND                       |           | CMH (K = 5)   |              | MAF           |       |          |           |           |
| Marker     | P             | OR           | P             | OR    | M        | Pat (326) | Con (329) | P             | OR           | P             | OR    | M        | Pat (227)                   | Con (221) | P             | OR           | P             | OR    | M        | Pat (107) | Con (113) |
| rs1064395  | 0.9010        | 1.018        | <b>0.0002</b> | 1.278 | A        | 0.18      | 0.17      | <b>0.0484</b> | 1.381        | <b>0.0024</b> | 1.211 | A        | 0.21                        | 0.17      | 0.4472        | 1.201        | <b>0.0006</b> | 1.232 | A        | 0.21      | 0.18      |
| rs11764590 | 0.0764        | 1.246        | <b>0.0096</b> | 1.165 | T        | 0.29      | 0.25      | 0.0528        | 1.343        | <b>0.0098</b> | 1.158 | T        | 0.28                        | 0.23      | 0.2606        | 1.280        | <b>0.0036</b> | 1.173 | T        | 0.26      | 0.22      |
| rs10278591 | 0.2064        | 1.171        | 0.0812        | 1.108 | T        | 0.28      | 0.25      | 0.2962        | 1.177        | 0.0612        | 1.111 | T        | 0.26                        | 0.23      | 0.9760        | 1.007        | <b>0.0304</b> | 1.126 | T        | 0.24      | 0.24      |
| rs6547829  | 0.6188        | 1.114        | <b>0.0136</b> | 1.239 | T        | 0.07      | 0.06      | 0.0770        | 1.500        | <b>0.0464</b> | 1.188 | T        | 0.11                        | 0.07      | 0.7190        | 1.161        | <b>0.0142</b> | 1.224 | T        | 0.06      | 0.05      |
| rs985409   | 0.2792        | 1.140        | <b>0.0440</b> | 1.107 | G        | 0.45      | 0.41      | 0.6790        | 1.062        | <b>0.0214</b> | 1.119 | G        | 0.46                        | 0.45      | 0.9667        | <b>0.992</b> | <b>0.0166</b> | 1.120 | G        | 0.47      | 0.47      |
| rs2209263  | 0.8870        | 0.982        | <b>0.0316</b> | 0.886 | A        | 0.27      | 0.27      | 0.5206        | 0.908        | 0.0552        | 0.901 | A        | 0.25                        | 0.27      | 0.6052        | 0.893        | 0.0514        | 0.902 | A        | 0.27      | 0.29      |
| rs779279   | 0.3497        | <b>1.110</b> | 0.1356        | 0.912 | <b>C</b> | 0.49      | 0.48      | 0.5386        | 0.921        | 0.0500        | 0.909 | A        | 0.42                        | 0.44      | 0.1826        | 0.783        | 0.0722        | 0.918 | A        | 0.44      | 0.50      |
| rs9322993  | 0.8837        | <b>0.966</b> | <b>0.0190</b> | 1.290 | T        | 0.06      | 0.06      | 0.4696        | 1.279        | 0.0518        | 1.222 | T        | 0.05                        | 0.04      | <b>0.0212</b> | 2.725        | 0.1102        | 1.176 | T        | 0.08      | 0.03      |

P, p value highlighted in bold if  $p < 0.05$ ; TREND, Cochran-Armitage test; OR, odds ratio referring to minor allele (highlighted in yellow when OR was in the opposite direction to GWAS); M, minor allele refers to dbSNP build 130 and was determined for patients (Pat) and controls (Con) in each analysis (highlighted in orange when minor allele has changed with respect to GWAS); CMH, Cochran-Mantel-Haenszel test; K, CMH's cluster variable.

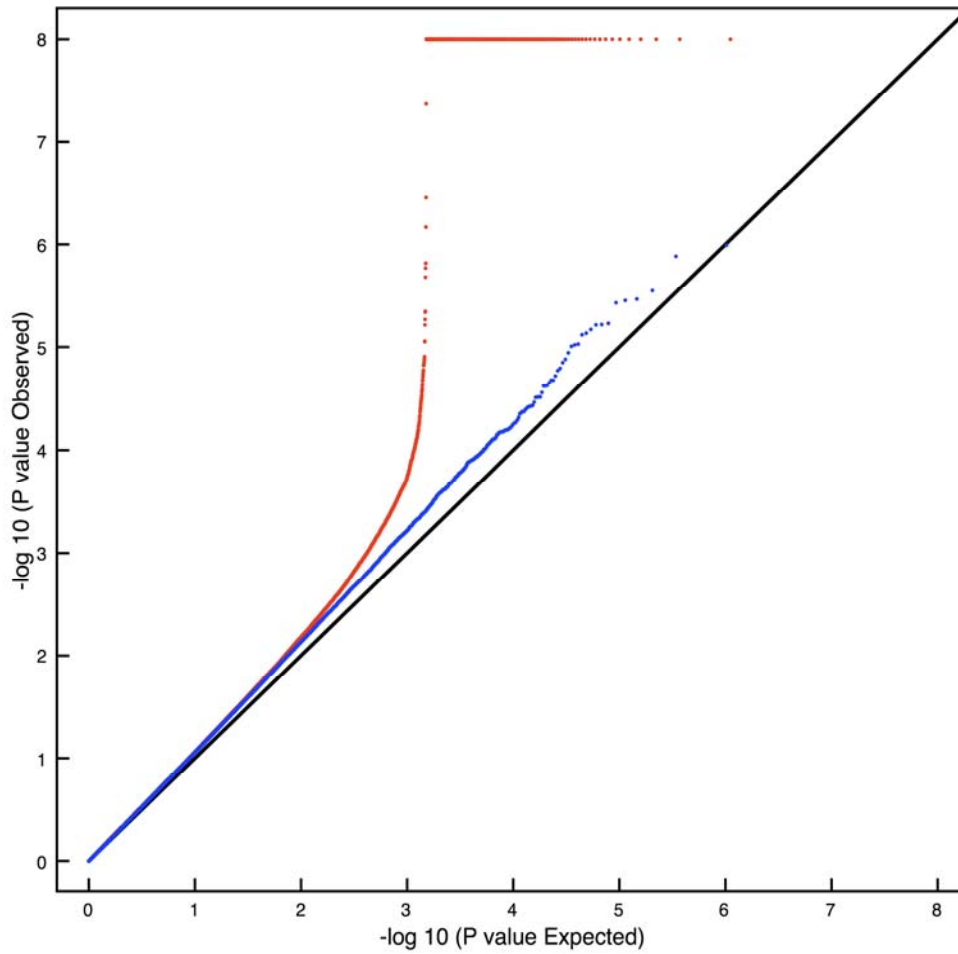

**Figure S1. Quantile-Quantile (QQ) Plot of Genome-wide Association Data**

QQ plot of TREND test p values from autosomal SNPs before (red curve) and after (blue curve) application of all QC filters; SNPs for which the test statistic exceeded an observed  $-\log(p)$  of 8 are fixed to 8. After filtering (blue curve), we observed a good adherence of data points to the line of expectance. This implies that spurious associations, characterized by an increase in the number of potential highly significant p values, were systematically removed. All remaining slight deviations from the line of expectance in the extreme tail are presumed to reflect true-positive genetic effects.



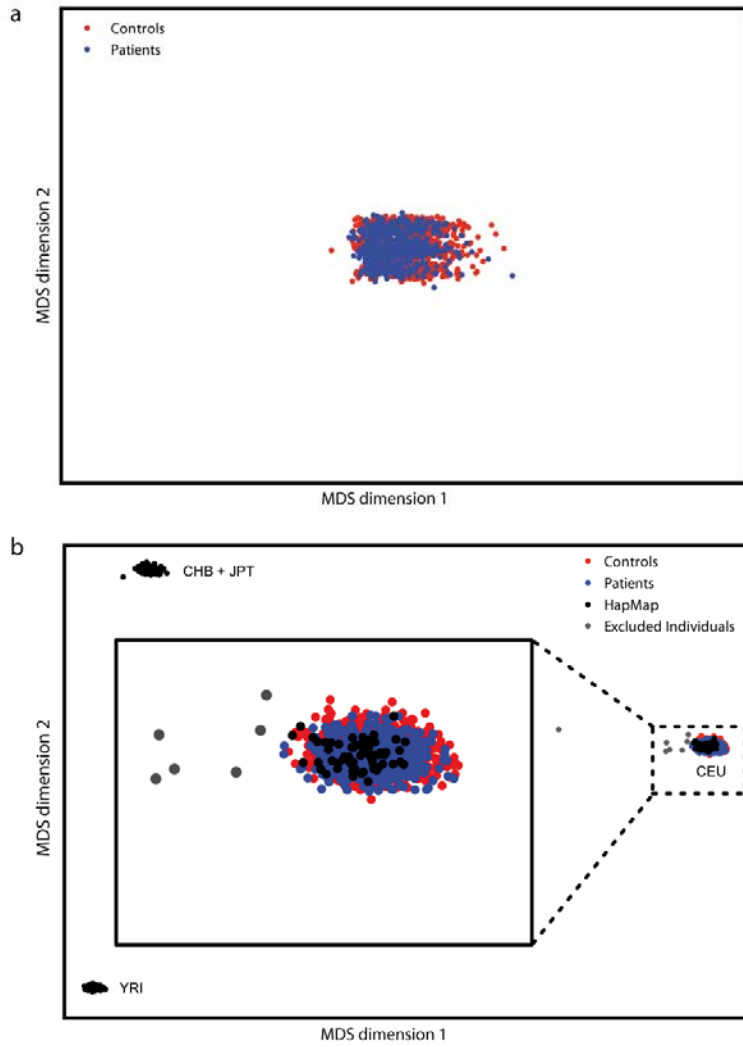

**Figure S2. Multi-Dimensional Scaling Analysis Based on Identity-By-State Distances**

(a) Between patients and controls from our GWAS sample and (b) between the GWAS sample and unrelated individuals from the four ethnically diverse HapMap panels (CHB, Han Chinese in Beijing, China; JPT, Japanese in Tokyo, Japan; CEU: Utah residents with Northern and Western European ancestry from the CEPH collection; YRI, Yoruba in Ibadan, Nigeria; phase II data). Only the first two dimensions are plotted, and each dot represents one individual. Seven individuals, who were either outliers within our GWAS sample and/or of non-European ancestry, were excluded from further analysis (grey dots).

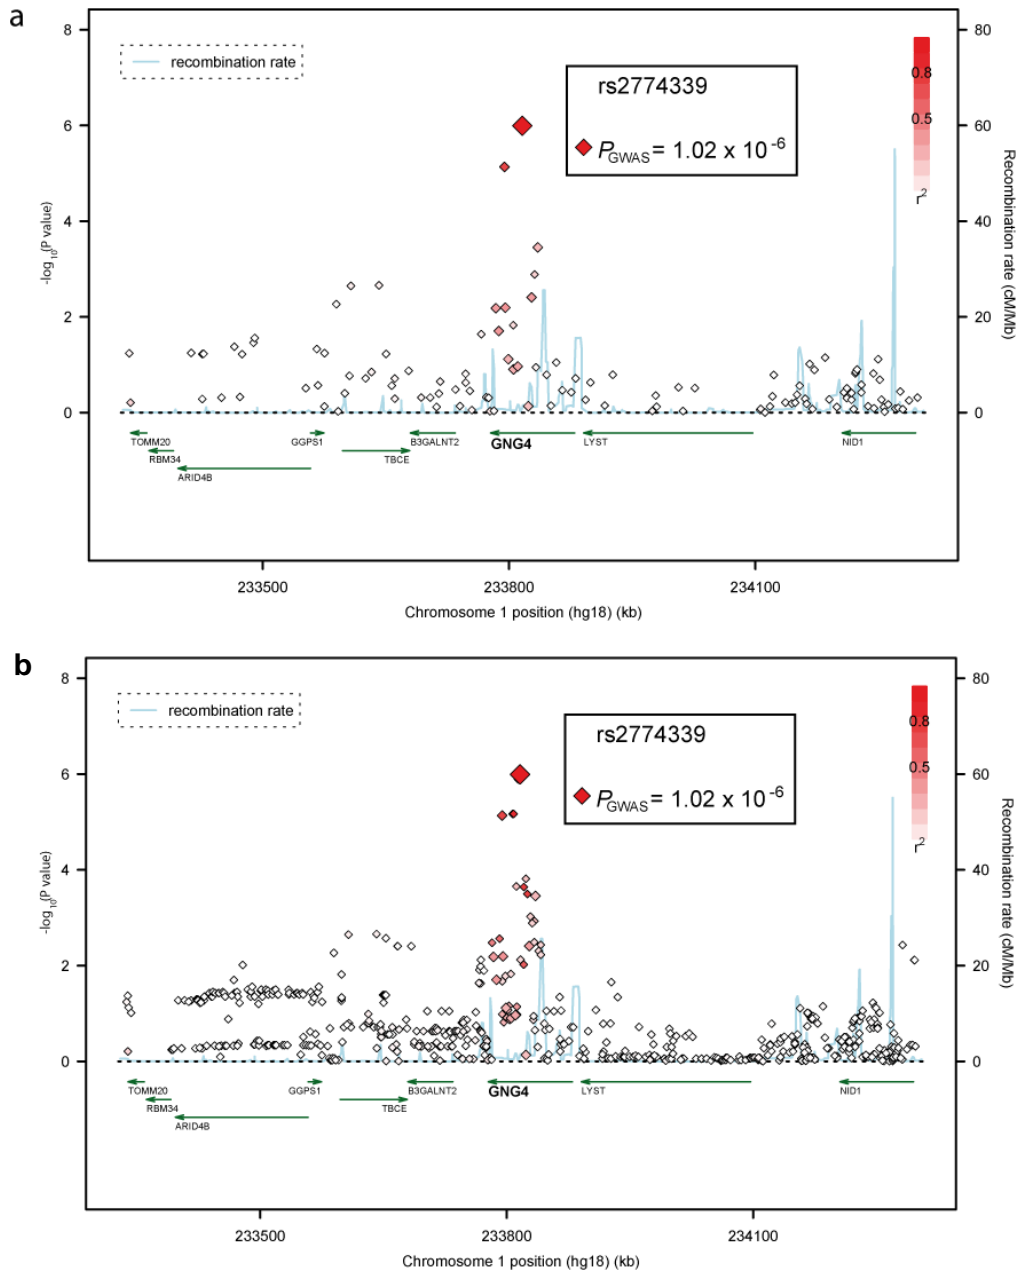

**Figure S3. Regional Association Plots Displaying *GNG4* rs2774339 which was not Supported in the Replication Step I Using (a) Genotyped and (b) Imputed and Genotyped SNPs**

TREND p values from SNPs are plotted against positions from the March 2006 human reference sequence, annotated by RefSeq genes. The most associated marker from the GWAS is indicated by an enlarged red diamond which is centered in a genomic window of around 1 Mb. The corresponding CMH p value from the combined analysis ( $p_{meta}$ ) is given by an enlarged blue diamond. The strength of LD (in  $r^2$ ) between the top SNP and its adjacent markers is demonstrated by the red (high) to white (low) color bar (top right corner). The recombination rate (second y axis) is plotted in light blue, according to HapMap-CEU. RAPs were generated using SNAP.<sup>43</sup>

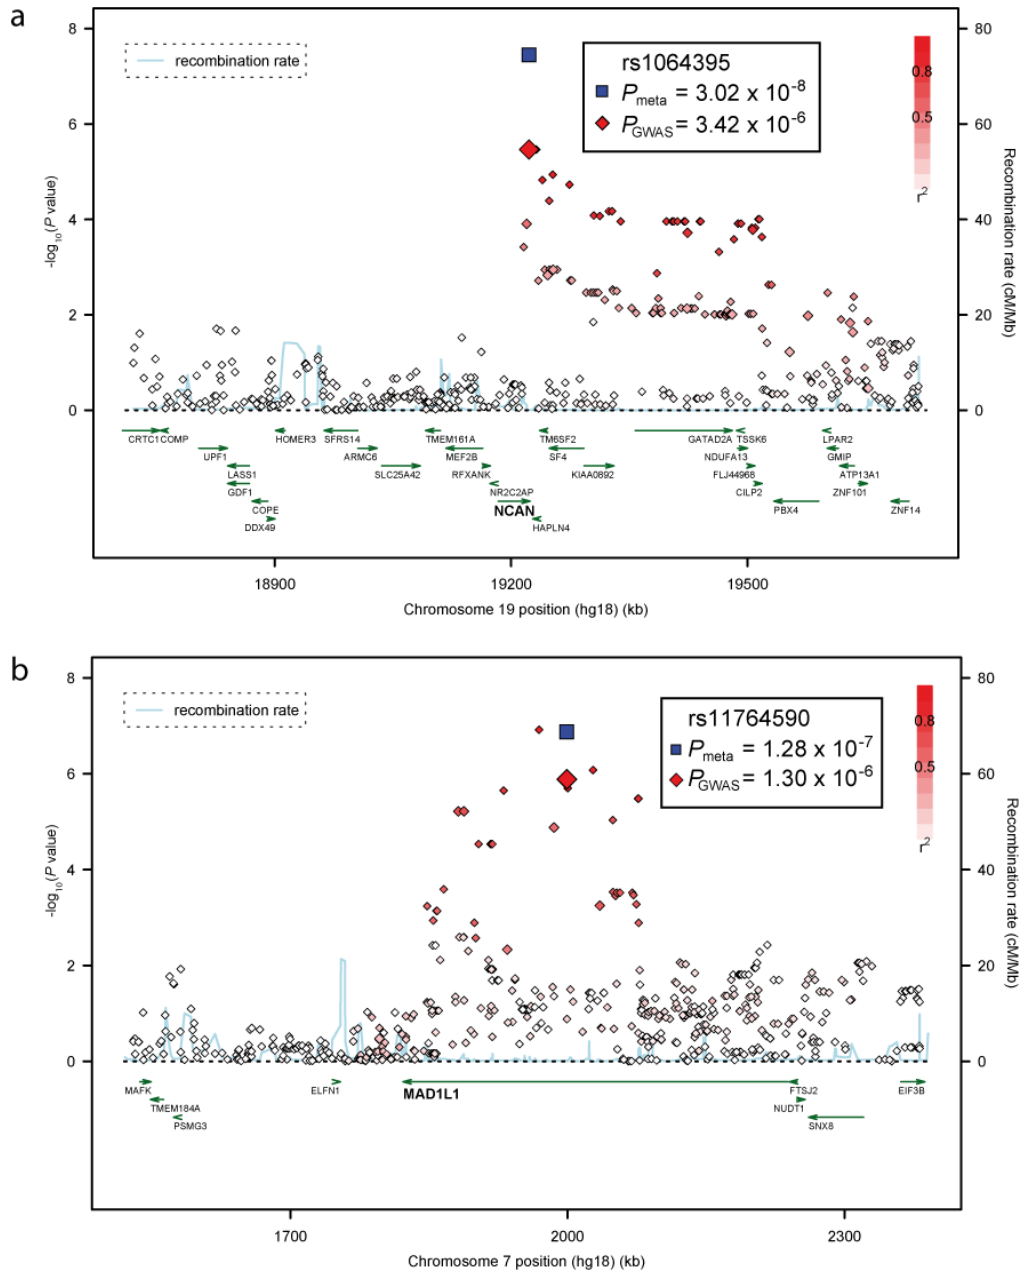

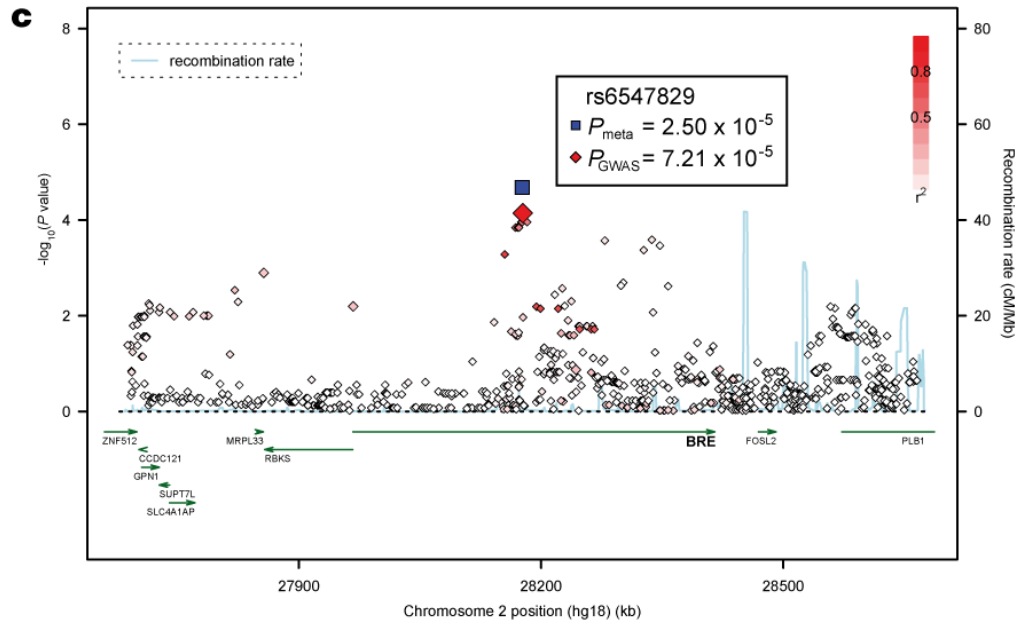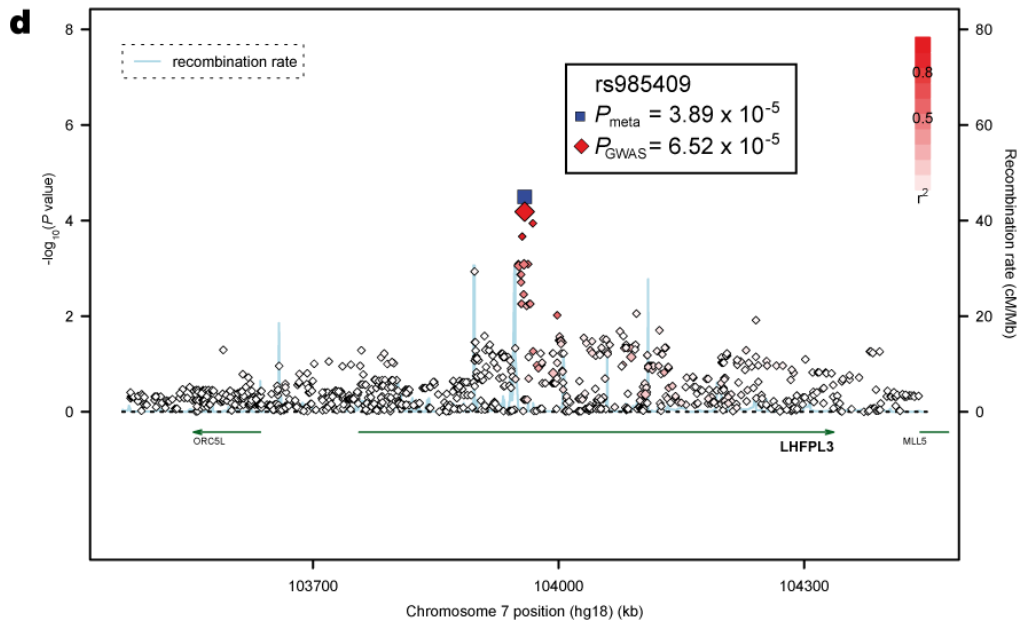

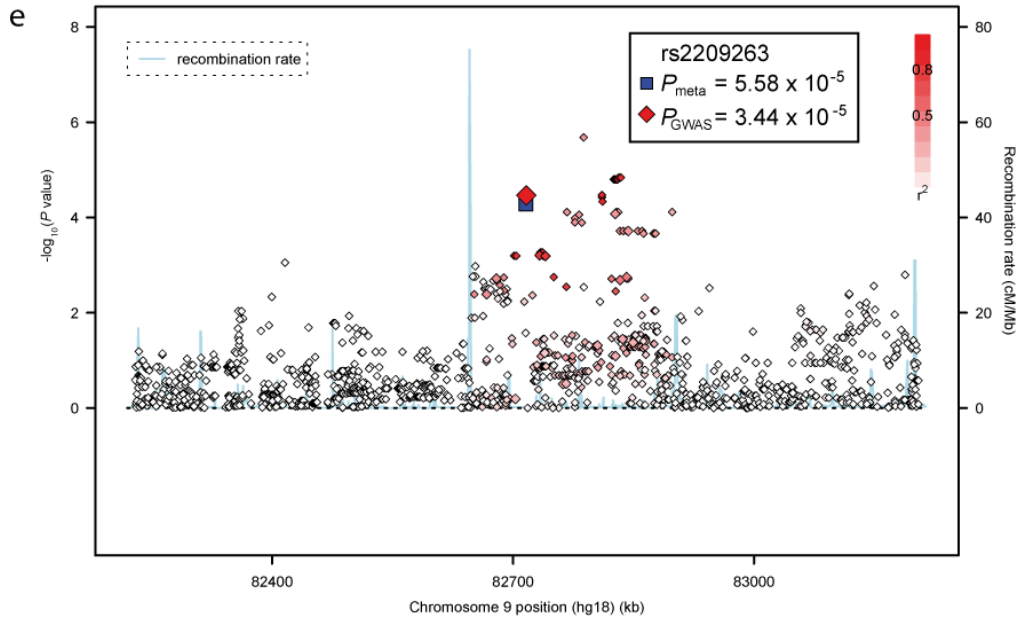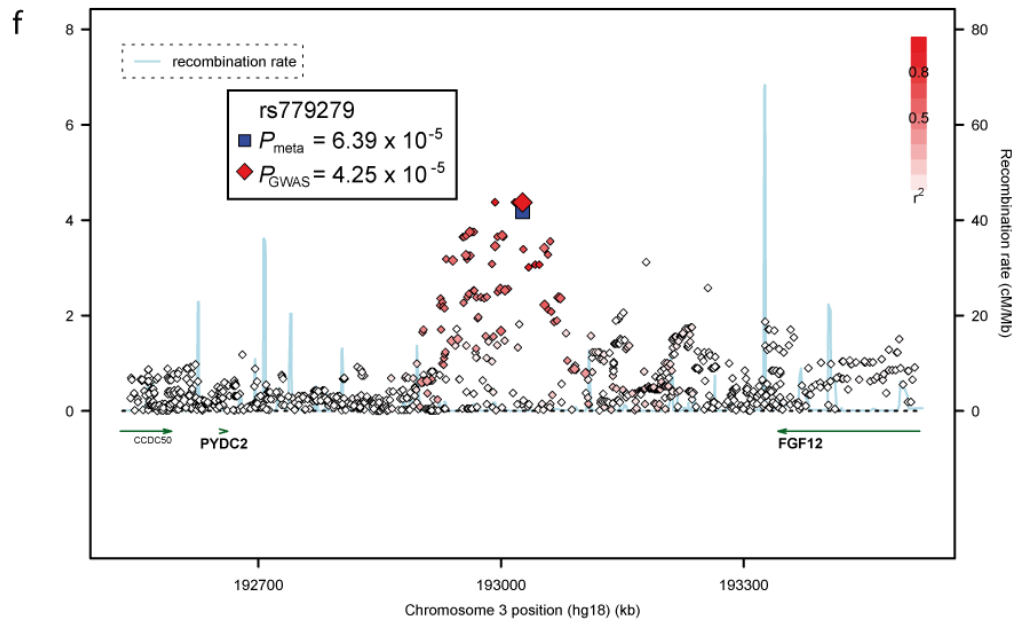

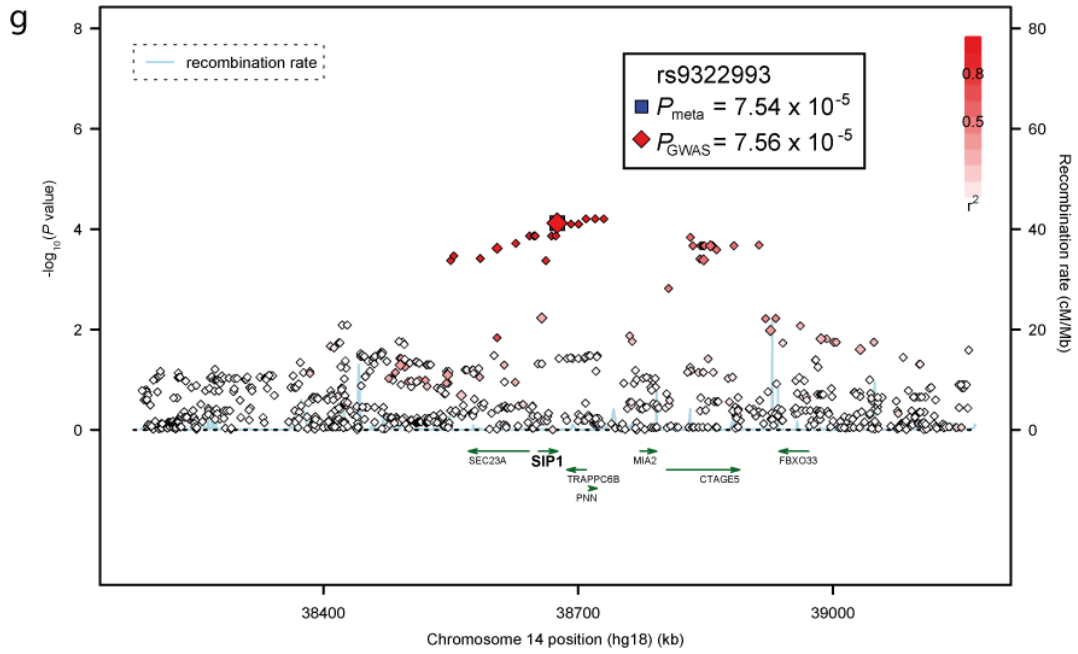

**Figure S4. Regional Association Plots Displaying All Seven Loci (a-g) with Evidence for Association in the Replication Step I Using Imputed and Genotyped SNPs.**  
A description of this figure is provided in Figure S3.

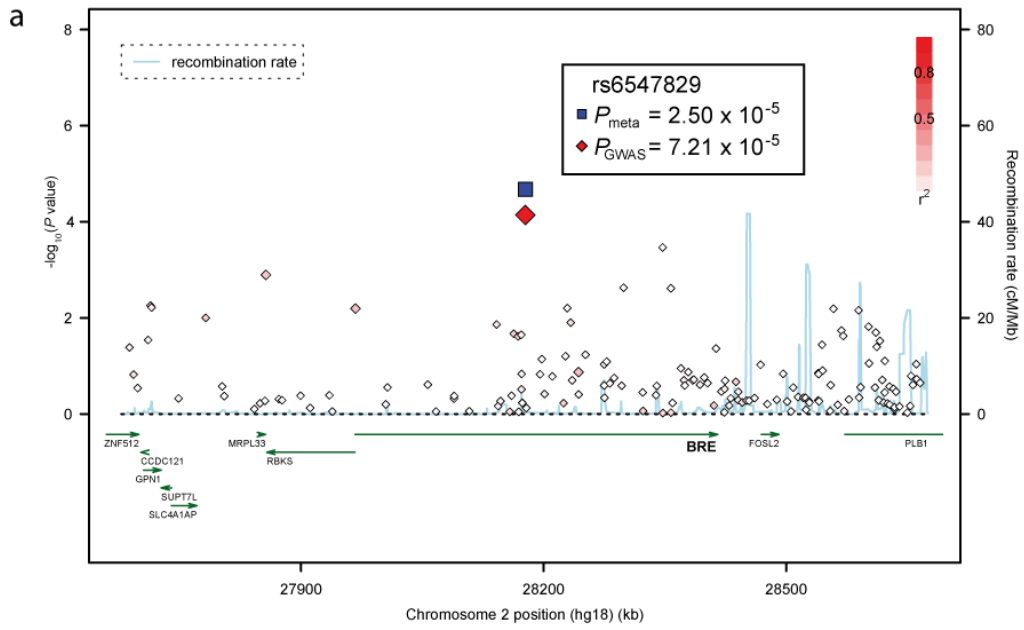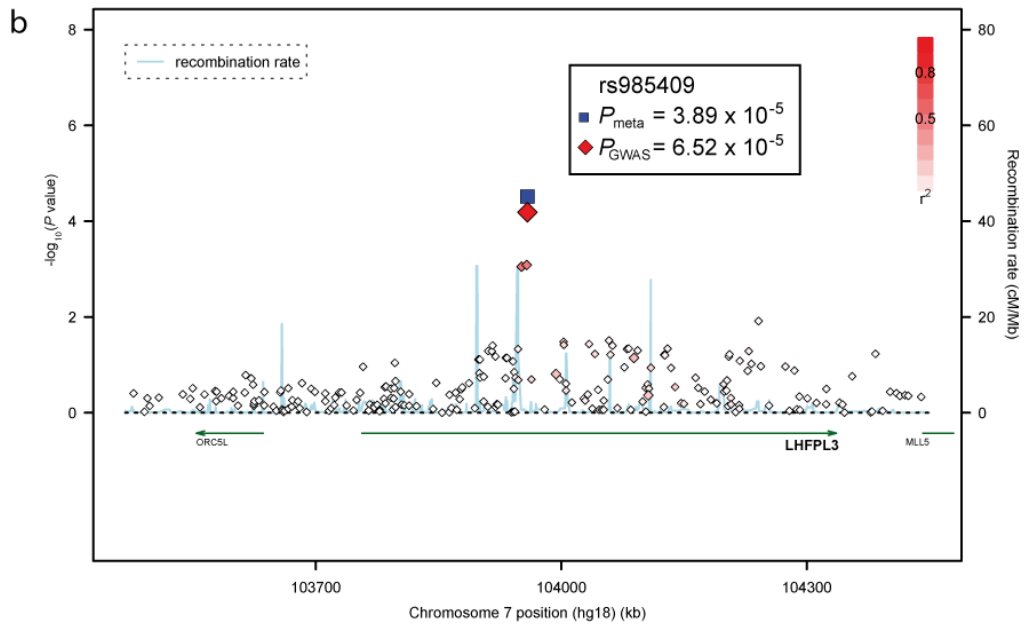

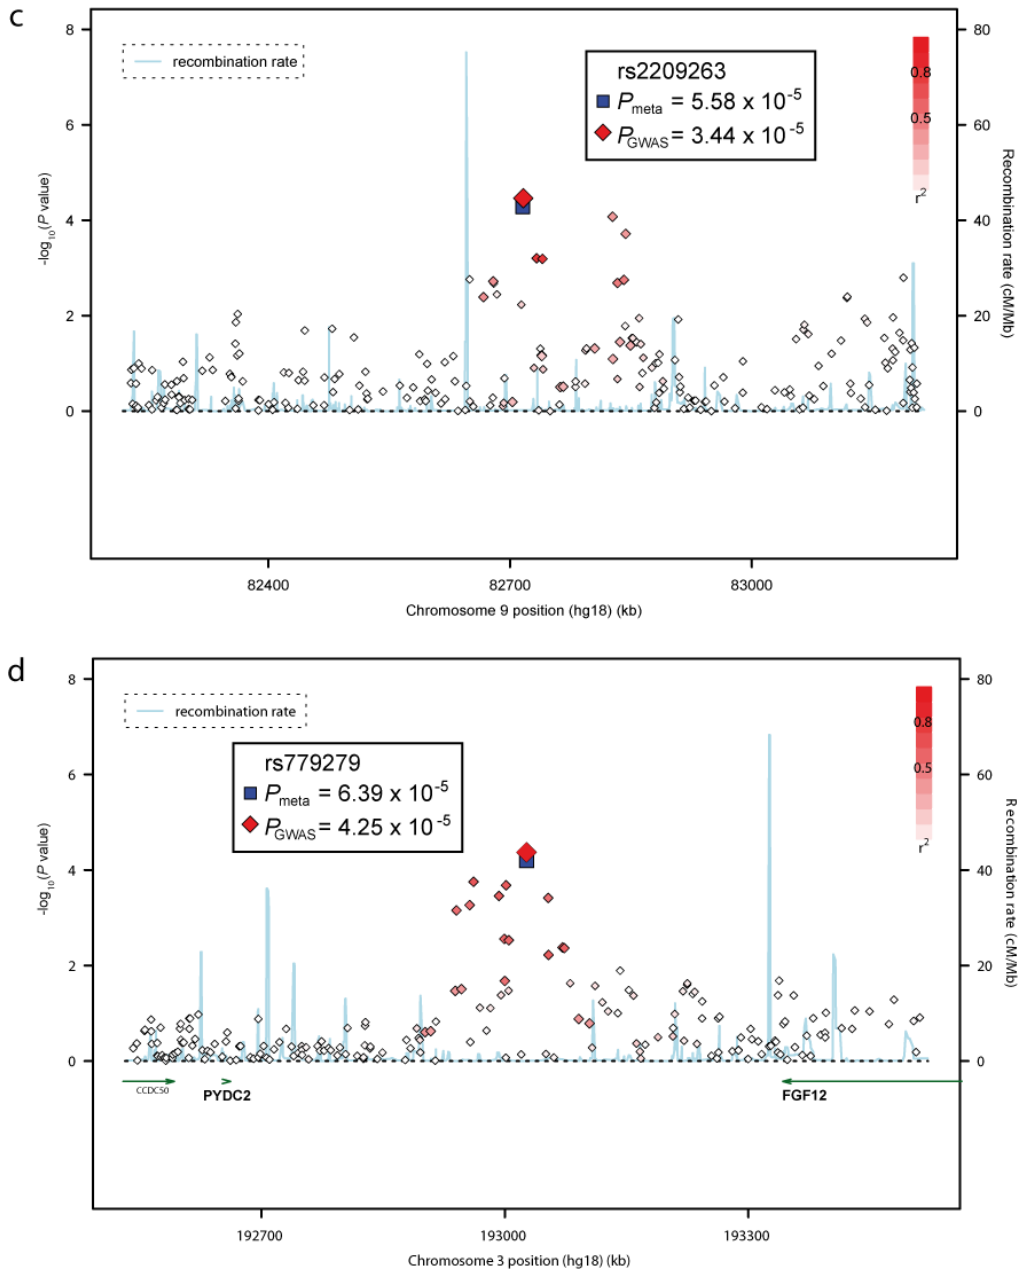



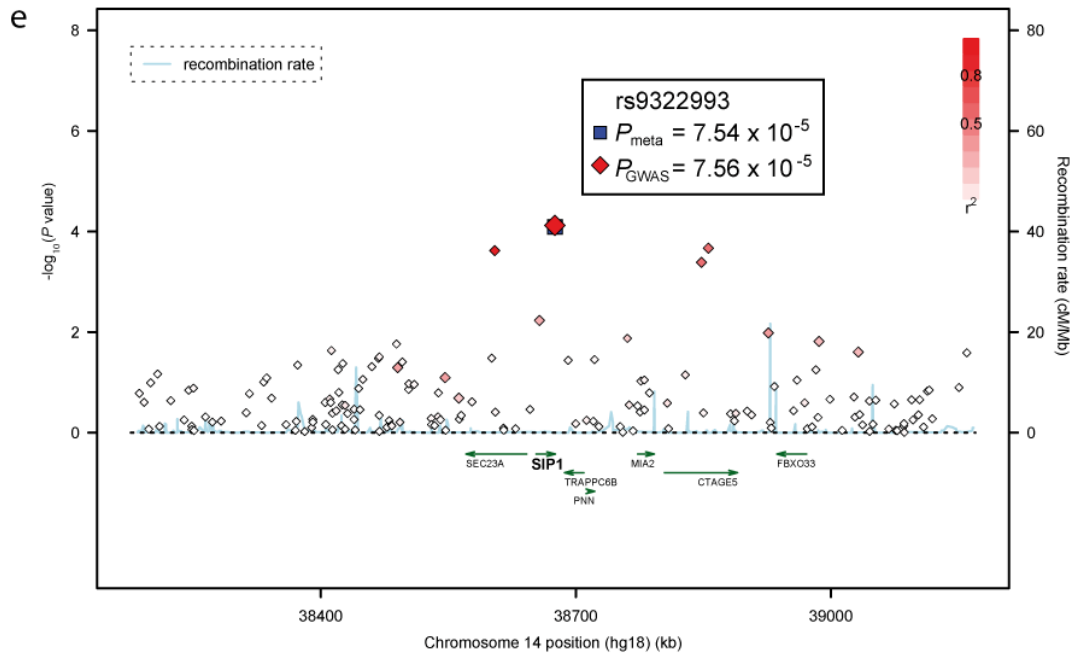

**Figure S5. Regional Association Plots Displaying the Five Additional Loci (a-e) with Evidence for Association in the Replication Step I.**

A description of this figure is provided in Figure S3.

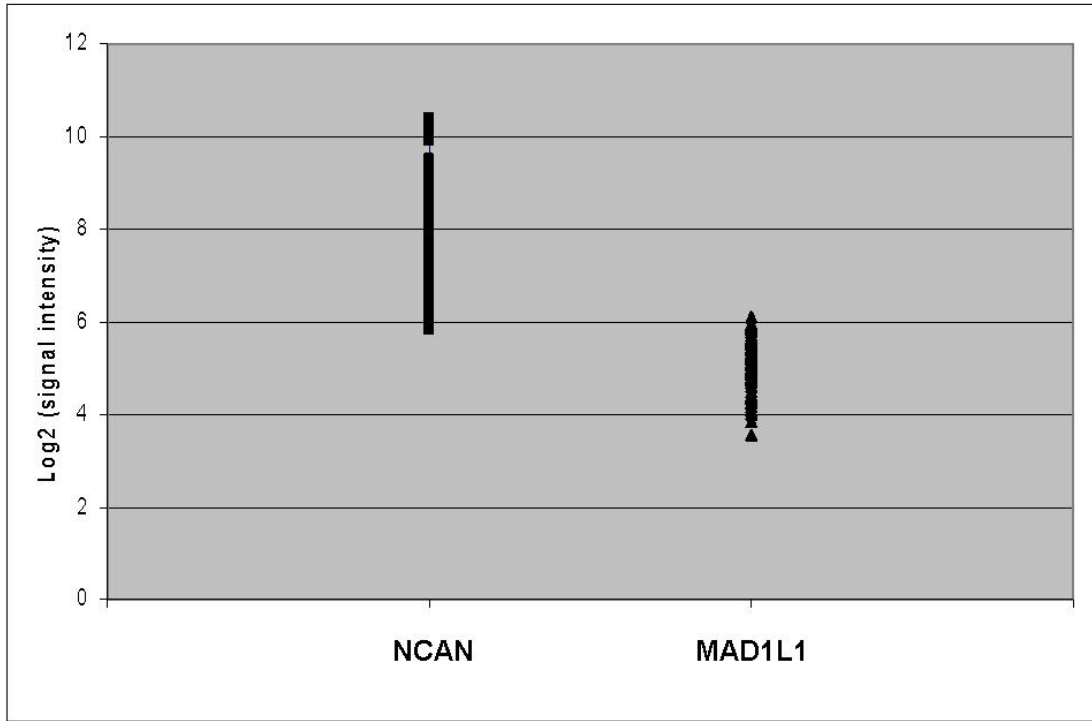

**Figure S6. Transcriptional Expression of *NCAN* and *MAD1L1* in Human Hippocampus Tissue**

Whole-genome expression analysis with HumanHT-12 Expression BeadArrays (n=148; Illumina, San Diego, USA) showed that *NCAN* (black boxes) was expressed in the hippocampus tissue with an average  $\text{log}_2$  ratio = 7.99 of signal intensities with a standard deviation of 0.8 (intensities, min = 5.82 and max = 10.4). Expression of *MAD1L1* (black triangles) in the human hippocampus showed an average  $\text{log}_2$  ratio = 5.21 of signal intensities with a standard deviation of 0.46 (intensities, min = 3.55 and max = 6.1). The expression profile was background-subtracted and average-normalized using Illumina's GenomeStudio software.

## References

43. Muglia, P., Tozzi, F., Galwey, N.W., Francks, C., Upmanyu, R., Kong, X.Q., Antoniadou, A., Domenici, E., Perry, J., Rothen, S. et al. (2010). Genome-wide association study of recurrent major depressive disorder in two European case-control cohorts. *Mol. Psychiatry* *15*, 589-601.
44. Etain, B., Dumaine, A., Mathieu, F., Chevalier, F., Henry, C., Kahn, J.P., Deshommes, J., Bellivier, F., Leboyer, M., and Jamain, S. (2010). A SNAP25 promoter variant is associated with early-onset bipolar disorder and a high expression level in brain. *Mol. Psychiatry* *15*, 748-755.
45. Thorgeirsson, T.E., Oskarsson, H., Desnica, N., Kostic, J.P., Stefansson, J.G., Kolbeinsson, H., Lindal, E., Gaganashvili, N., Frigge, M.L., Kong, A. et al. (2003). Anxiety with panic disorder linked to chromosome 9q in Iceland. *Am. J. Hum. Genet.* *72*, 1221-1230.
46. McAuley, E.Z., Blair, I.P., Liu, Z., Fullerton, J.M., Scimone, A., Van Herten, M., Evans, M.R., Kirkby, K.C., Donald, J.A., Mitchell, P.B., and Schofield, P.R. (2009). A genome screen of 35 bipolar affective disorder pedigrees provides significant evidence for a susceptibility locus on chromosome 15q. *Mol. Psychiatry* *14*, 492-500.
47. Mitchell, P.B., Johnston, A.K., Corry, J., Ball, J.R. and Malhi, G.S. (2009). Characteristics of bipolar disorder in an Australian specialist outpatient clinic: comparison across large datasets. *Aust. N. Z. J. Psychiatry* *43*, 109-117.
48. Medland, S.E., Nyholt, D.R., Painter, J.N., McEvoy, B.P., McRae, A.F., Zhu, G., Gordon, S.D., Ferreira, M.A., Wright, M.J., Henders, A.K. et al. (2009). Common variants in the trichohyalin gene are associated with straight hair in Europeans. *Am. J. Hum. Genet.* *85*, 750-755.
49. Djurovic, S., Gustafsson, O., Mattingsdal, M., Athanasiu, L., Bjella, T., Tesli, M., Agartz, I., Lorentzen, S., Melle, I., Morken G., and Andreassen, O.A., (2010) A genome-wide association study of bipolar disorder in Norwegian individuals, followed by replication in Icelandic sample. *J. Affect. Disord.* *126*, 312-316.
50. Athanasiu, L., Mattingsdal, M., Kähler, A.K., Brown, A., Gustafsson, O., Agartz, I., Giegling, I., Muglia, P., Cichon, S., Rietschel, M., et al. (2010). Gene variants associated with schizophrenia in a Norwegian genome-wide study are replicated in a large European cohort. *J. Psychiatr. Res.* *44*, 748-753.
51. Howie, B.N., Donnelly, P., and Marchini, J., (2009). A flexible and accurate genotype imputation method for the next generation of genome-wide association studies. *PLoS Genetics* *5*, e1000529.
52. Kong, A., Masson, G., Frigge, M.L., Gylfason, A., Zusmanovich, P., Thorleifsson, G., Olason, P.I., Ingason, A., Steinberg, S., Rafnar, T., et al. (2008). Detection of sharing by descent, long-range phasing and haplotype imputation. *Nat. Genet.* *40*, 1068-1075.
